# Supplementary material for: Hydrogen-bonding-assisted charge transfer: significantly enhanced photocatalytic H2 evolution over g-C3N4 anchored with ferrocene-based hole relay
Source: Royal Society of Chemistry journal article supplement (doi:10.1039/c8cy00488a), 2018-01-01
Supplement: c8cy00488a1.pdf [file c8cy00488a1.pdf]

## Supporting Information

### **Hydrogen-Bonding-Assisted Charge Transfer: Significantly Enhanced Photocatalytic H<sub>2</sub> Evolution over g-C<sub>3</sub>N<sub>4</sub> Anchored with Ferrocene-based Hole Relay**

Ya-Nan Liu,<sup>a</sup> Xiao Zhou,<sup>a</sup> Cong-Cong Shen,<sup>a</sup> Zhi-Wei Zhao,<sup>a</sup> Yi-Fan Jiang,<sup>a</sup> Liu-Bo Ma,<sup>a</sup> Xiao-Xiang Fang,<sup>a</sup> Zeb, Akif,<sup>a</sup> Tuck-Yun Cheag,<sup>\*b</sup> and An-Wu Xu<sup>\*a</sup>

*<sup>a</sup>Division of Nanomaterials and Chemistry, Hefei National Laboratory for Physical Sciences at Microscale, Department of Chemistry Physics, University of Science and Technology of China, Hefei, Anhui 230026, People's Republic of China.*

*<sup>b</sup>Department of Breast and Thyroid Surgery, The First Affiliated Hospital of Sun Yat-Sen University, Guangzhou 510080, China*

*\*To whom correspondence should be addressed.*

*Email: [anwuxu@ustc.edu.cn](mailto:anwuxu@ustc.edu.cn)*

In the FT-IR spectrum of FcDA, the band at  $1695\text{ cm}^{-1}$  is assigned to the stretching mode of C=O.<sup>1</sup> When the C=O group is involved in hydrogen bonds, the resonance will take place and then influence their stretching wave-numbers.<sup>2</sup> The vibration of C=O moves to low wave-number ( $1695\text{--}1670\text{ cm}^{-1}$ ) in the spectrum of FcDA/CN composite, indicating that the hydrogen bonding has been formed between FcDA and g-C<sub>3</sub>N<sub>4</sub>.<sup>2</sup> The broad peak at  $3000\text{--}3700\text{ cm}^{-1}$ , attributed to the unpolymerized N-H vibration of g-C<sub>3</sub>N<sub>4</sub>, shifts to large wave-number slightly, which is induced by the effect from hydrogen bonding of N-H groups in the g-C<sub>3</sub>N<sub>4</sub> with carboxylic groups in the FcDA.<sup>3</sup>

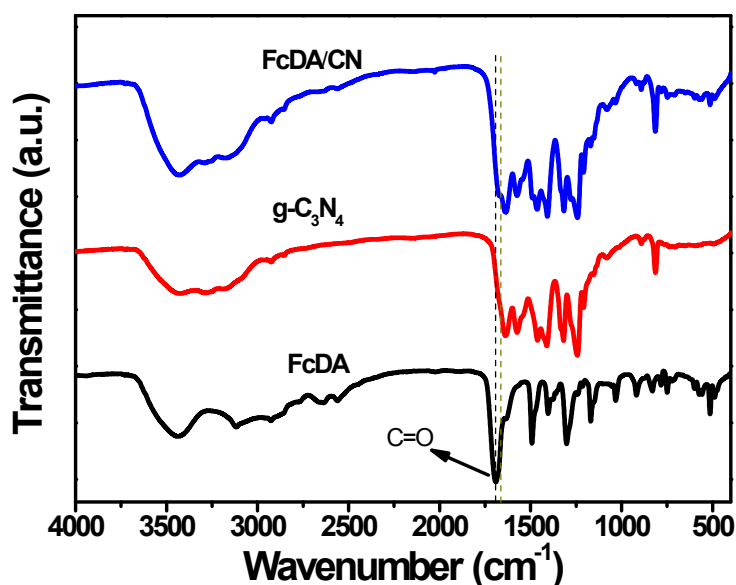

**Fig. S1** The FTIR spectra of FcDA, g-C<sub>3</sub>N<sub>4</sub> and FcDA/CN composite.

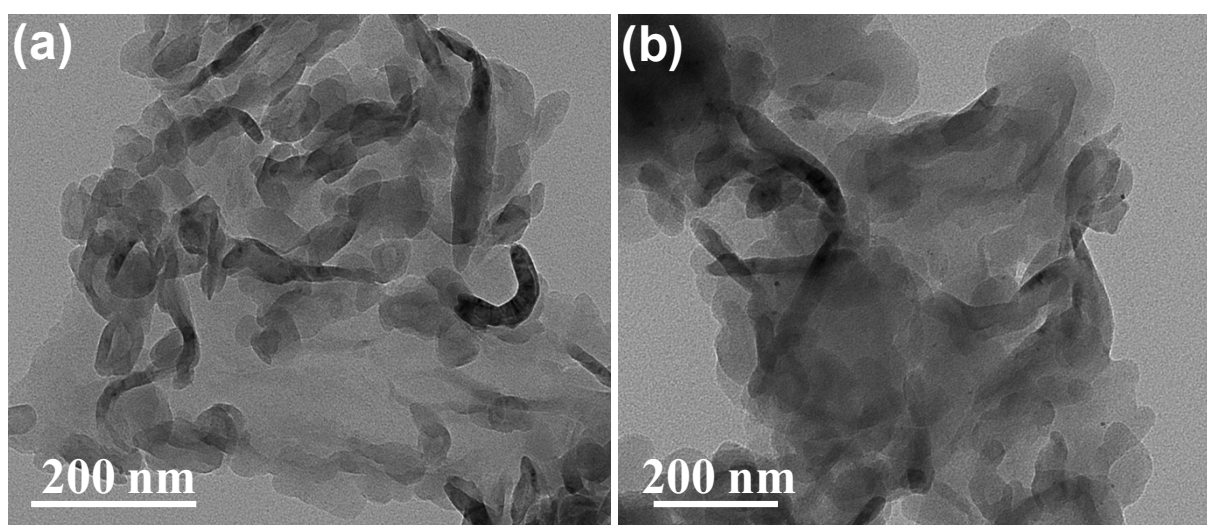

**Fig. S2** TEM images of (a) pure g-C<sub>3</sub>N<sub>4</sub> and (b) FcDA/CN with 1 wt % Pt loading.

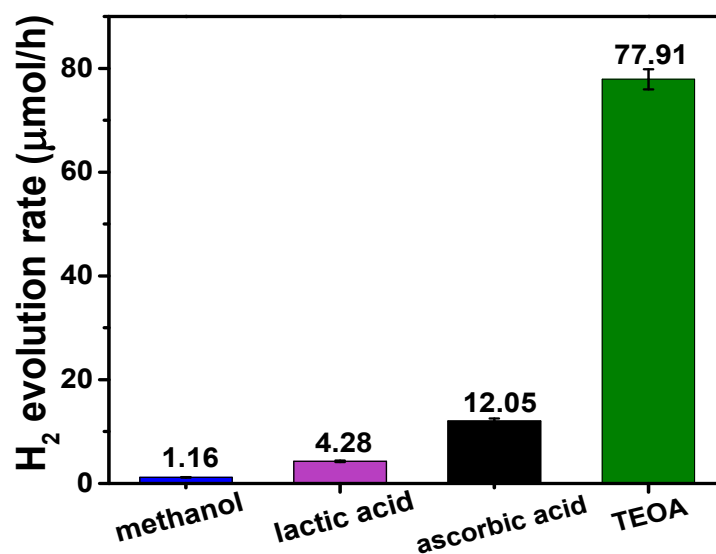

**Fig. S3** Comparison of photocatalytic hydrogen evolution rates on 4 wt% FcDA/CN photocatalyst in the presence of different sacrificial reagents under visible light ( $\lambda \geq 420$  nm). Reaction conditions: catalyst, 50 mg; 100 mL of solution containing sacrificial reagents; light source, xenon lamp (300 W) with a cutoff filter; temperature, 10 °C.

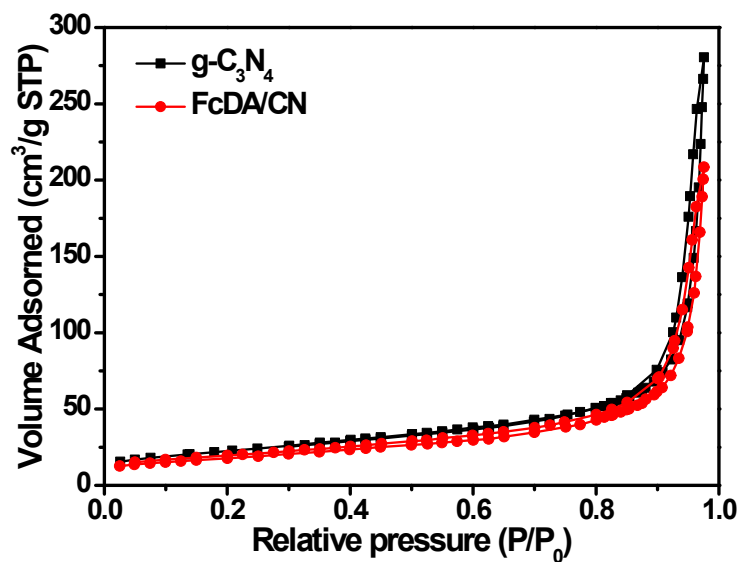

**Fig. S4** The nitrogen adsorption/desorption isotherms of  $\text{g-C}_3\text{N}_4$  and FcDA/CN composite.

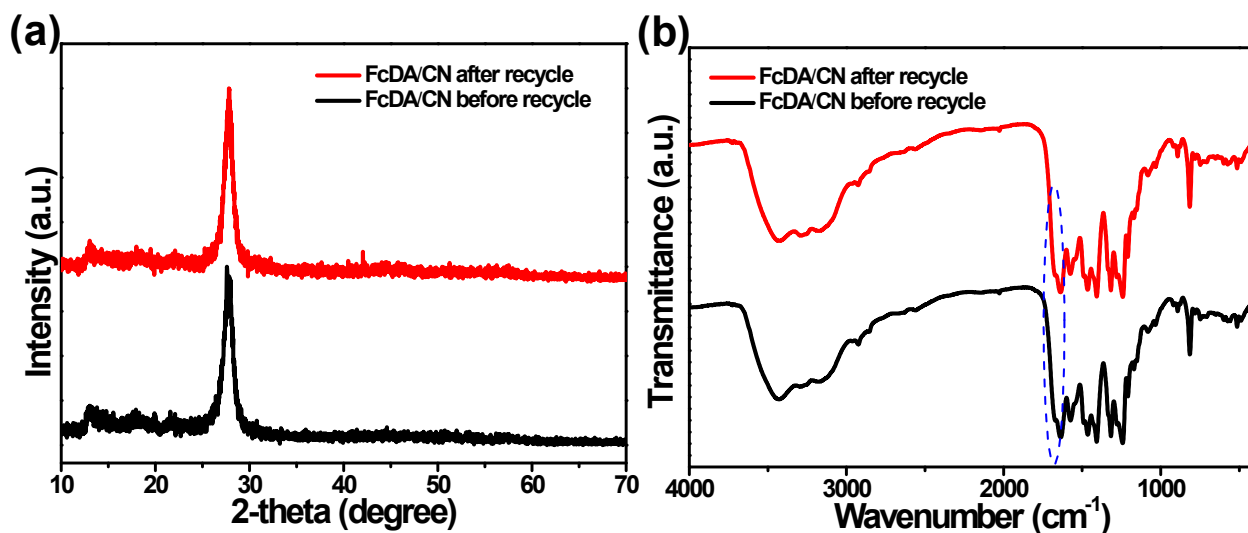

**Fig. S5** The XRD patterns (a) and FT-IR spectra (b) of FcDA/CN composite before and after cycle test.

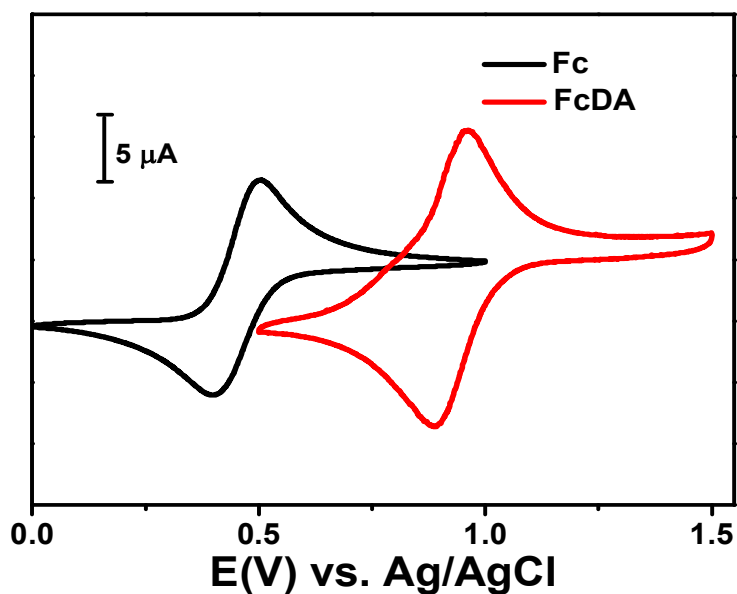

**Fig. S6** Cyclic voltammograms of the Fc and FcDA collected in 0.1 M of Bu<sub>4</sub>NPF<sub>6</sub> in acetonitrile, scanned at 50 mV s<sup>-1</sup>, Ag<sup>+</sup>/AgCl as a reference electrode, freshly polished 3.0 mm diameter glassy carbon button electrode served as the working electrode, Pt wire as a counter electrode. The concentration of FcDA in solution was approximately 1 mM. Onset potential with reference to Fc,  $E_{\text{OX}} = E_{\text{Ag}^+/\text{AgCl}} - E_{\text{Fc}}$ ; Calculated from the equation,  $\text{HOMO} = -(4.80_{(\text{Fc})} + E_{\text{OX}})$  eV.<sup>4</sup>

## Notes and references

1. J. X. Tao and W. J. Xiao, *J. Organomet. Chem.*, 1996, **526**, 21–24.
2. Z. H. Sun, W. M. Sun, C. T. Chen, G. H. Zhang, X. Q. Wang and D. Xu, *Spectrochimica Acta Part A*, 2011, **83**, 39–45.
3. L. Lin, C. C. Hou, X. H. Zhang, Y. J. Wang, Y. Chen and T. He, *Appl. Catal. B-Environ.*, 2018, **221**, 312–319.
4. J. Lee, M. M. Byranvand, G. Kang, S. Y. Son, S. Song, G. –W. Kim, T. Park, *J. Am. Chem. Soc.*, 2017, **139**, 12175–12181.
